# Supplementary material for: Arboviral Disease Outbreaks in the Pacific Islands Countries and Areas, 2014 to 2020: A Systematic Literature and Document Review
Source: MDPI journal article supplement (doi:10.3390/pathogens11010074), 2022-01-07
Supplement: s1 [file s1]

## Supplementary material

**Table S1.** Summary of arboviral disease outbreaks (confirmed/ suspected/ unspecified) affecting Pacific island countries and areas, October 1, 2014 to June 30, 2020.

| First reported (Mth/ Yr) | PICs             | Latest information | Implicated virus | Summary notes and reported case numbers (confirmed/suspected/unspecified)                                                                                                                                                                                                                                                                                                                                                                                 |
|--------------------------|------------------|--------------------|------------------|-----------------------------------------------------------------------------------------------------------------------------------------------------------------------------------------------------------------------------------------------------------------------------------------------------------------------------------------------------------------------------------------------------------------------------------------------------------|
| Pre-Oct 2014             | New Caledonia    | Nov 2014           | DENV unspecified | PacNet: Not mentioned on PacNet during our date range<br>Literature: Not described in the literature<br>ProMed: 334 cases reported<br>The majority of this outbreak occurred prior to the study date range<br>Imported cases: No imported cases were reported in another country from this outbreak                                                                                                                                                       |
| Pre-Oct 2014             | Tonga            | Mar 2015           | DENV3            | PacNet: 174 cases reported to PacNet - Stated DENV3 was identified<br>Literature: Craig 2018 reported that there was an outbreak of DEN3 during this time, however, did not mention specific case numbers<br>ProMed: 400 cases mentioned on ProMed<br>Imported cases: 24 cases detected in New Zealand as imported cases from Tonga                                                                                                                       |
| Pre-Oct 2014             | French Polynesia | May 2016           | DENV1            | PacNet: 1114 cases reported to PacNet - reported that it was DENV1<br>Literature: Aubry 2019 mentioned described this outbreak however did not report specific numbers<br>Craig 2018 reported that there was an outbreak of DEN1 during this time, however, did not mention specific case numbers<br>ProMed: 2188 cases reported on ProMed<br>Imported cases: 14 cases detected as imported cases into New Zealand, 1 imported case into the Cook Islands |
| Nov 2014                 | Cook Islands     | Feb 2015           | DENV1            | PacNet: 2 cases confirmed as DENV1<br>Literature: Not described in the literature<br>ProMed: Not reported on ProMed<br>Imported cases: No imported cases were reported in another country from this outbreak                                                                                                                                                                                                                                              |
| Nov 2014                 | Cook Islands     | Feb 2015           | DENV3            | PacNet: 1 case confirmed as DENV3<br>Literature: Not described in the literature<br>ProMed: Not reported on ProMed<br>Imported cases: No imported cases were reported in another country from this outbreak                                                                                                                                                                                                                                               |
| Nov 2014                 | Cook Islands     | Feb 2015           | DENV unspecified | PacNet: 2 cases identified with an unspecified serotype<br>Literature: Not described in the literature                                                                                                                                                                                                                                                                                                                                                    |

| First reported (Mth/ Yr) | PICs            | Latest information | Implicated virus | Summary notes and reported case numbers (confirmed/suspected/unspecified)                                                                                                                                                                                                                                                                                                     |
|--------------------------|-----------------|--------------------|------------------|-------------------------------------------------------------------------------------------------------------------------------------------------------------------------------------------------------------------------------------------------------------------------------------------------------------------------------------------------------------------------------|
|                          |                 |                    |                  | ProMed: Not reported on ProMed<br>Imported cases: No imported cases were reported in another country from this outbreak                                                                                                                                                                                                                                                       |
| Jan 2015                 | Fiji            | Feb 2015           | DENV2            | PacNet: 157 cases reported<br>Literature: Craig 2018 reported that there was an outbreak of DEN2 during this time; however, it did not mention specific case numbers<br>ProMed: 3 articles mentioned outbreaks in Fiji on ProMed, all with varying case numbers ranging from 382 to 500<br>Imported cases: 6 cases were imported into New Zealand as imported cases from Fiji |
| Feb 2015                 | New Caledonia   | May 2015           | DENV unspecified | PacNet: 3 autochthonous cases reported on Pacnet<br>Literature: Not described in the literature<br>ProMed: 2 ProMed articles mention this outbreak. The first described 1 local case; however, the other reported 200 cases<br>Imported cases: No imported cases were reported in another country from this outbreak                                                          |
| Feb 2015                 | Kiribati        | Feb 2015           | DENV unspecified | PacNet: There was an entry on PacNet describing this outbreak; however, it was only reported as “several” cases<br>Literature: Not described in the literature<br>ProMed: Not reported on ProMed<br>Imported cases: No imported cases were reported in another country from this outbreak                                                                                     |
| March 2015               | Solomon Islands | Mar 2015           | DENV3            | PacNet: 9 laboratory-confirmed cases<br>Literature: Not described in the literature<br>ProMed: Not reported on ProMed<br>Imported cases: No cases were imported into another country                                                                                                                                                                                          |
| May 2015                 | America Samoa   | Nov 2015           | DENV3            | PacNet: 477 cases<br>Literature: Cotter 2019 described this outbreak with total numbers reaching 900 cases<br>Craig 2018 reported that there was an outbreak of DENV3 during this time, however, it did not mention specific case numbers<br>ProMed: Not reported on ProMed<br>Imported cases: No cases were imported into another country                                    |
| June 2015                | Samoa           | Sept 2016          | DENV3            | PacNet: 1507 cases<br>Literature: Craig 2018 reported that there was an outbreak of DENV3 during this time, however, did not mention                                                                                                                                                                                                                                          |

| First reported (Mth/ Yr) | PICs          | Latest information | Implicated virus | Summary notes and reported case numbers (confirmed/suspected/unspecified)                                                                                                                                                                                                                                                                                                                                                                                                                                                                                                                                                                         |
|--------------------------|---------------|--------------------|------------------|---------------------------------------------------------------------------------------------------------------------------------------------------------------------------------------------------------------------------------------------------------------------------------------------------------------------------------------------------------------------------------------------------------------------------------------------------------------------------------------------------------------------------------------------------------------------------------------------------------------------------------------------------|
|                          |               |                    |                  | <p>specific case numbers</p> <p>ProMed: Not reported on ProMed</p> <p>Imported cases: 31 cases from this outbreak were imported to New Zealand, 21 to Queensland, Australia Australia</p>                                                                                                                                                                                                                                                                                                                                                                                                                                                         |
| Oct 2015                 | New Caledonia | Oct 2015           | DENV1            | <p>PacNet: 1 case</p> <p>Literature: Not described in the literature</p> <p>ProMed: Not reported on ProMed</p> <p>Imported cases: No cases were imported into another country</p>                                                                                                                                                                                                                                                                                                                                                                                                                                                                 |
| Dec 2015                 | PNG           | May 2016           | DENV2            | <p>Pacnet: DENV2 was reported as an outbreak in Dec 2015 in Western Province of PNG</p> <p>Literature: 2 literature sources discuss DENV2 during this time frame in PNG</p> <p>Moore 2017: Discussed increased activity of DENV2 in 2015 and 2016</p> <p>Craig 2018 reported that there was an outbreak of DENV2 during this time; however, it did not mention specific case numbers</p> <p>ProMed: One article reported 250 cases total of all serotypes. One article reported 48 imported DENV2 cases into Queensland, Australia</p> <p>Imported cases reported on PacNet: 57 cases of DENV2 imported into Queensland, Australia, Australia</p> |
| Jan 2016                 | PNG           | May 2016           | DENV1            | <p>PacNet: PacNet did not report local DENV1 cases during this period; however, it did report DENV2, DENV3 and unspecified, and it did report imported cases of DENV1 from PNG to Queensland, Australia, Australia</p> <p>Literature: 2 literature sources discuss DENV1 during this time frame in PNG</p> <p>Moore 2017: Reported DENV1 activity in 2016</p> <p>ProMed: One article reported 250 cases total of all serotypes. One article reported 5 imported DENV1 cases into Queensland, Australia</p> <p>Imported cases reported on PacNet: 5 cases of DENV1 imported into Queensland, Australia, Australia</p>                              |
| Jan 2016                 | PNG           | May 2016           | DENV3            | <p>PacNet: Circulation of DENV3 was reported on PacNet in May 2016</p> <p>Literature: 3 literature sources discuss DENV3 during this time frame in PNG</p> <p>Mavian 2018 states that DENV3 was present in PNG in 2016, nil specific case numbers discussed</p> <p>Moore 2017:Reported DENV3 activity in 2016</p> <p>ProMed: One article reported 250 cases total of all serotypes. One article reported 3 imported DENV3 cases into Queensland, Australia</p>                                                                                                                                                                                    |

| First reported (Mth/ Yr) | PICs            | Latest information | Implicated virus | Summary notes and reported case numbers (confirmed/suspected/unspecified)                                                                                                                                                                                                                                                                                                                                                                                                                                                                                                                                                            |
|--------------------------|-----------------|--------------------|------------------|--------------------------------------------------------------------------------------------------------------------------------------------------------------------------------------------------------------------------------------------------------------------------------------------------------------------------------------------------------------------------------------------------------------------------------------------------------------------------------------------------------------------------------------------------------------------------------------------------------------------------------------|
|                          |                 |                    |                  | Imported cases reported on PacNet: 4 cases of DENV3 imported into Queensland, Australia, Australia                                                                                                                                                                                                                                                                                                                                                                                                                                                                                                                                   |
| Jan 2016                 | PNG             | October 2016       | DENV4            | <p>PacNet: PacNet did not report local DENV4 cases during this period; however, it did report DENV2, DENV3 and unspecified, and it did report imported cases of DENV4 from PNG to Queensland, Australia, Australia</p> <p>Literature: Moore 2017 reported samples of DENV4 recorded between July and October 2016</p> <p>ProMed: One article reported 250 cases total of all serotypes. One article reported 1 imported DENV4 case into Queensland, Australia</p> <p>Imported cases reported on PacNet: 4 cases of DENV4 imported into Queensland, Australia, Australia</p>                                                          |
| Jan 2016                 | PNG             | Oct 2016           | DENV unspecified | <p>PacNet: 170 DENV unspecified cases in Jan 2016</p> <p>Literature: 2 literature sources discussed DENV unspecified at this time</p> <p>Pulsan 2016 studied a specific cohort of 165 children admitted to hospital with DENV from Jan-July 2016 with no mention of a specific serotype</p> <p>ProMed: One article reported 250 cases total of all serotypes. One article reported 10 imported cases of DENV unspecified serotype into Queensland, Australia</p> <p>Imported cases reported on PacNet: 11 cases of DENV unspecified imported into Queensland, Australia, Australia, 4 cases of DENV unspecified from New Zealand</p> |
| Jan 2016                 | Kiribati        | Jan 2016           | DENV unspecified | <p>PacNet: 117 cases</p> <p>Literature: Not described in the literature</p> <p>ProMed: Not reported on ProMed</p> <p>Imported cases: No cases were imported into another country</p>                                                                                                                                                                                                                                                                                                                                                                                                                                                 |
| Jan 2016                 | Fiji            | May 2016           | DENV unspecified | <p>PacNet: 93 cases</p> <p>Literature: Sheel 2019 reported that 4520 suspected cases were present in Fiji in 2016</p> <p>ProMed: One data entry reported 332 cases in May 2016; however, another reported 623 in August 2016</p> <p>Imported cases: 3 cases were imported into New Zealand and 2 into Queensland, Australia</p>                                                                                                                                                                                                                                                                                                      |
| Feb 2016                 | FSM (Yap State) | May 2016           | DENV unspecified | <p>PacNet: 3</p> <p>Literature: Not described in the literature</p> <p>ProMed: Not reported on ProMed</p> <p>Imported cases: No cases were imported into another country</p>                                                                                                                                                                                                                                                                                                                                                                                                                                                         |
| Feb 2016                 | New             | June 2016          | DENV1            | PacNet: 2                                                                                                                                                                                                                                                                                                                                                                                                                                                                                                                                                                                                                            |

| First reported (Mth/ Yr) | PICs                           | Latest information | Implicated virus | Summary notes and reported case numbers (confirmed/suspected/unspecified)                                                                                                                                                                                                                                                                                                                                                      |
|--------------------------|--------------------------------|--------------------|------------------|--------------------------------------------------------------------------------------------------------------------------------------------------------------------------------------------------------------------------------------------------------------------------------------------------------------------------------------------------------------------------------------------------------------------------------|
|                          | Caledonia                      |                    |                  | Literature: Not described in the literature<br>ProMed: 528 cases reported<br>Imported cases: No cases were imported into another country                                                                                                                                                                                                                                                                                       |
| June 2016                | Vanuatu                        | July 2017          | DENV2            | PacNet: 2950<br>Literature: Aubry 2019 reported 2 imported cases from Vanuatu into French Polynesia in Feb 2017<br>Craig 2018 reported that there was an outbreak of DEN2 during this time; however, it did not mention specific case numbers<br>ProMed: 2000 cases reported<br>Imported cases: 47 (Queensland, Australia, Aus), 4 (New Zealand), 21 (New Caledonia), 3 (French Polynesia)                                     |
| Oct 2016                 | Republic of Palau              | Dec 2017           | DENV unspecified | PacNet: 440 cases<br>Literature: Not described in the literature<br>ProMed: 51 cases<br>Imported cases: No cases were imported into another country                                                                                                                                                                                                                                                                            |
| Oct 2016                 | Federated States of Micronesia | Dec 2016           | DENV unspecified | PacNet: 93 cases (6 laboratory confirmed)<br>Literature: Not described in the literature<br>ProMed: Not reported on ProMed<br>Imported cases: No cases were imported into another country                                                                                                                                                                                                                                      |
| Nov 2016                 | American Samoa                 | April 2017         | DENV2            | PacNet: 885<br>Literature: Cotter 2018 3240 DENV2 cases<br>Craig 2018 reported that there was an outbreak of DEN2 during this time; however, it did not mention specific case numbers<br>ProMed: Not reported on ProMed<br>Imported cases: No cases were imported into another country                                                                                                                                         |
| Dec 2016                 | Solomon Islands                | June 2017          | DENV1            | PacNet: PacNet cases for this DENV outbreak were reported as DENV2 (12,250 DENV2 cases); however, PacNet reported imported cases of DENV1<br>Literature: No DENV1 was described in the literature at this time whilst DENV was in Solomon Islands<br>ProMed: No specific DENV1 cases for this outbreak described in ProMed<br>Imported cases reported on PacNet: 1 x DENV 1 case (Queensland, Australia, Aus), 6 (New Zealand) |

| First reported (Mth/ Yr) | PICs            | Latest information | Implicated virus | Summary notes and reported case numbers (confirmed/suspected/unspecified)                                                                                                                                                                                                                                                                                                                                                                                                                                                                                                                                                                      |
|--------------------------|-----------------|--------------------|------------------|------------------------------------------------------------------------------------------------------------------------------------------------------------------------------------------------------------------------------------------------------------------------------------------------------------------------------------------------------------------------------------------------------------------------------------------------------------------------------------------------------------------------------------------------------------------------------------------------------------------------------------------------|
| Dec 2016                 | Solomon Islands | June 2017          | DENV2            | <p>PacNet: 12,250 cases - on Dec 11 2016 a PacNet post stated that 60% of samples were DENV2</p> <p>Literature: 2 literature sources mentioned this outbreak</p> <p>Craig 2018 stated 12329 cases of DENV2, Mavian 2018 states this was DENV2; however, it does not quote any total case numbers</p> <p>ProMed: No specific DENV2 cases for this outbreak described in ProMed</p> <p>Imported cases: 14 x DENV2 (Queensland, Australia, Aus), 2 x DENV2 (New Zealand)</p>                                                                                                                                                                      |
| Dec 2016                 | Solomon Islands | June 2017          | DENV3            | <p>PacNet: reported that DENV3 serotype was also identified in circulation on Dec 4 2016 as part of the larger DENV outbreak; however, the outbreak was mostly reported as a DENV2 outbreak (12,250 cases)</p> <p>Literature: No DENV3 for this outbreak described in the literature</p> <p>ProMed: No specific DENV3 cases for this outbreak described in ProMed</p> <p>Imported cases: 7 x DENV3 (Queensland, Australia, Aus)</p>                                                                                                                                                                                                            |
| Dec 2016                 | Solomon Islands | June 2017          | DENV unspecified | <p>PacNet: Most PacNet cases for this DENV outbreak were reported as DENV2 (12,250 DENV2 cases) and DENV3; however, there were imported cases into other countries reported on PacNet that were unspecified</p> <p>Literature: No DENV unspecified for this outbreak described in the literature</p> <p>ProMed: 10,000 cases unspecified DENV cases reported in ProMed</p> <p>Imported cases reported on PacNet: 8 x DENV unspecified (Queensland, Australia, Aus), 4 x DENV unspecified (New Zealand), 1 x DENV unspecified (Niue)</p>                                                                                                        |
| Jan 2017                 | New Caledonia   | Sept 2017          | DENV1            | <p>PacNet: reported that an outbreak of DENV1 was declared on 5 Jan 2017. The total number of cases for all DENV serotypes circulating during this time was 4467. A breakdown of each strain case number was not provided.</p> <p>Literature:</p> <p>Serie 2020 specific cohort of 385 cases hospitalised in New Caledonia with dengue with many also having hepatitis.</p> <p>Craig 2018 reported that there was an outbreak of DENV1 during this time; however, did not mention specific case numbers.</p> <p>ProMed: No specific DENV1 cases reported for this outbreak</p> <p>Imported cases: 2 x DENV1 were imported into New Zealand</p> |
| Jan 2017                 | New Caledonia   | Sept 2017          | DENV2            | <p>PacNet: DENV2 was reported to be circulating during this timeframe. The total number of cases for all DENV strains circulating during this time was 4467. A breakdown of each strain case numbers was not provided.</p> <p>Literature: Craig 2018 reported that there was an outbreak of DEN2 during this time; however, they did not mention specific case numbers.</p>                                                                                                                                                                                                                                                                    |

| First reported (Mth/ Yr) | PICs          | Latest information | Implicated virus | Summary notes and reported case numbers (confirmed/suspected/unspecified)                                                                                                                                                                                                                                                                                                                                                                                                                                                                                                                                                                                                                                                                                                                                  |
|--------------------------|---------------|--------------------|------------------|------------------------------------------------------------------------------------------------------------------------------------------------------------------------------------------------------------------------------------------------------------------------------------------------------------------------------------------------------------------------------------------------------------------------------------------------------------------------------------------------------------------------------------------------------------------------------------------------------------------------------------------------------------------------------------------------------------------------------------------------------------------------------------------------------------|
|                          |               |                    |                  | ProMed: No specific DENV2 cases were reported for this outbreak.<br>Imported cases: 2 x DENV2 were imported into New Zealand.                                                                                                                                                                                                                                                                                                                                                                                                                                                                                                                                                                                                                                                                              |
| Jan 2017                 | New Caledonia | Sept 2017          | DENV3            | PacNet: DENV3 was reported to be circulating during this timeframe. The total number of cases for all DENV strains circulating during this time was 4467. A breakdown of case numbers was not provided.<br>Literature:<br>Serie 2020– specific cohort of 385 cases of dengue hospitalised in NC with dengue + hepatitis suggests a large outbreak if hundreds of people are hospitalised with a specific complication. Serie stated that DENV3 was present in this cohort and was frequently associated with hepatitis.<br>Craig 2018 reported that there was an outbreak of DEN3 during this time; however, did not mention specific case numbers<br>ProMed: No specific DENV3 cases were reported for this outbreak<br>Imported cases: No specific DENV cases were imported from NC into another country |
| Jan 2017                 | New Caledonia | Sept 2017          | DENV unspecified | PacNet: No DENV unspecified were specifically mentioned during this timeframe; however, PacNet reported imported cases<br>Literature: Serie 2020 – specific cohort of 385 cases of dengue hospitalised in NC with dengue + hepatitis suggests large outbreak if hundreds of people are hospitalised with a specific complication<br>ProMed: 1163 cases of DENV unspecified<br>Imported cases reported on PacNet: 2 x DENV unspecified were imported into New Zealand from NC                                                                                                                                                                                                                                                                                                                               |
| Feb 2017                 | Fiji          | Nov 2017           | DENV unspecified | PacNet: 2395 unspecified cases<br>Literature: Not described in the literature<br>ProMed: 115 in one report, 3136 in another report<br>Imported cases: 18 imported cases into Queensland, Australia and 10 into New Zealand                                                                                                                                                                                                                                                                                                                                                                                                                                                                                                                                                                                 |
| February 2017            | Nauru         | Oct 2017           | DENV2            | PacNet: 964<br>Literature: Craig 2018 reported that there was an outbreak of DEN2 during this time; however, did not mention specific case numbers<br>ProMed: 50 cases<br>Imported cases: 8 imported into Queensland, Australia.                                                                                                                                                                                                                                                                                                                                                                                                                                                                                                                                                                           |
| May 2017                 | Niue          | July 2017          | DENV4            | PacNet: A post stated that in this time frame an “increase in cases” were seen in Niue, with confirmation of DENV4 serotype                                                                                                                                                                                                                                                                                                                                                                                                                                                                                                                                                                                                                                                                                |

| First reported (Mth/ Yr) | PICs              | Latest information | Implicated virus | Summary notes and reported case numbers (confirmed/suspected/unspecified)                                                                                                                                                                                                                                                                  |
|--------------------------|-------------------|--------------------|------------------|--------------------------------------------------------------------------------------------------------------------------------------------------------------------------------------------------------------------------------------------------------------------------------------------------------------------------------------------|
|                          |                   |                    |                  | Literature: Not described in the literature<br>ProMed: 1 case was reported<br>Imported cases: 5 cases were imported into New Zealand                                                                                                                                                                                                       |
| Aug 2017                 | Samoa             | May 2018           | DENV2            | PacNet: 3255 cases<br>Literature: Craig 2018 reported that there was an outbreak of DEN2 during this time; however, did not mention specific case numbers<br>ProMed: 1788 cases<br>Imported cases: 103 cases imported into New Zealand, 29 imported into Queensland, Australia.                                                            |
| Nov 2017                 | Wallis and Futana | Dec 2018           | DENV1            | PacNet: 225 cases<br>Literature: Craig 2018 reported that there was an outbreak of DENV1 during 2017; however, they did not mention specific case numbers<br>ProMed: 229 cases<br>Imported cases: No cases were imported into another country                                                                                              |
| Jan 2018                 | Tonga             | Oct 2018           | DENV unspecified | PacNet: 69 cases<br>Literature: Not described in the literature<br>ProMed: 52 cases<br>Imported cases: 37 (New Zealand) 6 (Queensland, Australia)                                                                                                                                                                                          |
| Jan 2018                 | Fiji              | June 2018          | DENV unspecified | PacNet: 3437 cases, 4 deaths<br>Literature: Not described in the literature<br>ProMed: One article described 862 cases, another stated 3437.<br>Imported cases: 18 cases imported to (New Zealand), 5 cases imported into (Queensland, Australia, Aus)                                                                                     |
| Jan 2018                 | New Caledonia     | Nov 2018           | DENV1            | PacNet: Total of 2003 cases of DENV during this timeframe, with 183 being DENV1<br>Mostly co-circulation of DENV 1 and DENV 2 - circulation of DENV1 - 15% of the cases<br>Literature: Not described in the literature<br>ProMed: 883 total. 740 were typed. 135 were DENV1.<br>Imported cases: No DENV1 cases imported to another country |
| Jan 2018                 | New Caledonia     | Nov 2018           | DENV2            | PacNet: Officially declared as a DENV2 outbreak. However, co-circulation noted - mostly with DENV1.<br>Total of 2003 cases of DENV during this timeframe, with 1130 (85%) being DENV2                                                                                                                                                      |



| First reported (Mth/ Yr) | PICs          | Latest information | Implicated virus | Summary notes and reported case numbers (confirmed/suspected/unspecified)                                                                                                                                                                                                                                                                                                                                                      |
|--------------------------|---------------|--------------------|------------------|--------------------------------------------------------------------------------------------------------------------------------------------------------------------------------------------------------------------------------------------------------------------------------------------------------------------------------------------------------------------------------------------------------------------------------|
|                          |               |                    |                  | <p>Literature: Not described in the literature</p> <p>ProMed: 883 total. 740 were typed. 602 were DENV2.</p> <p>Imported cases: 3 DENV2 cases were imported into Queensland, Australia. 1 x DENV unspecified was imported into New Zealand</p>                                                                                                                                                                                 |
| Jan 2018                 | New Caledonia | Nov 2018           | DENV3            | <p>PacNet: Total of 2003 cases of DENV during this timeframe, with 2 being DENV3</p> <p>Literature: Not described in the literature</p> <p>ProMed: 883 total. 740 were typed. 2 were DENV3</p> <p>Imported cases: No DENV3 cases imported to another country</p>                                                                                                                                                               |
| Jan 2018                 | New Caledonia | Nov 2018           | DENV4            | <p>PacNet: Total of 2003 cases of DENV during this timeframe, with 2 being DENV4</p> <p>Literature: Not described in the literature</p> <p>ProMed: 883 total. 740 were typed. 1 was DENV4.</p> <p>Imported cases: No DENV4 cases imported to another country</p>                                                                                                                                                               |
| Jan 2018                 | Kiribati      | Oct 2018           | DENV2            | <p>PacNet: 1778, 217 hospitalisations, 2 deaths</p> <p>Literature: Not described in the literature</p> <p>ProMed: 387 reported between Jan and May 2018</p> <p>Imported cases: 3 imported into Queensland, Australia</p>                                                                                                                                                                                                       |
| Feb 2018                 | PNG           | Dec 2018           | DENV unspecified | <p>PacNet: 7 cases reported of DENV unspecified reported in PNG</p> <p>Literature: Not described in the literature</p> <p>ProMed: Not reported on ProMed</p> <p>Imported cases reported on PacNet: 19 DENV cases were imported into Queensland, Australia, Australia in this time frame, 7 cases confirmed as DENV unspecified, 4 cases were confirmed as DENV1, 1 case was confirmed as DENV2, 7 cases confirmed as DENV4</p> |
| Feb 2018                 | PNG           | Dec 2018           | DENV1            | <p>PacNet: No local DENV1 cases were reported just local DENV unspecified cases, however there were DENV1 cases imported from PNG to Australia</p> <p>Literature: Not described in the literature</p> <p>ProMed: Not reported on ProMed</p> <p>Imported cases reported on PacNet: 19 DENV cases were imported into Queensland, Australia, Australia in this time frame, 4 cases confirmed as DENV1</p>                         |

| First reported (Mth/ Yr) | PICs             | Latest information | Implicated virus | Summary notes and reported case numbers (confirmed/suspected/unspecified)                                                                                                                                                                                                                                                                                                                    |
|--------------------------|------------------|--------------------|------------------|----------------------------------------------------------------------------------------------------------------------------------------------------------------------------------------------------------------------------------------------------------------------------------------------------------------------------------------------------------------------------------------------|
| Feb 2018                 | PNG              | Dec 2018           | DENV2            | PacNet: No local DENV2 cases were reported local DENV unspecified cases; however, there were DENV2 cases imported from Papua New Guinea to Australia<br>Literature: Not described in the literature<br>ProMed: Not reported on ProMed<br>Imported cases reported on PacNet: 19 DENV cases were imported into Queensland, Australia, Australia in this time frame, 1 case confirmed as DENV2  |
| Feb 2018                 | PNG              | Dec 2018           | DENV4            | PacNet: No local DENV4 cases were reported local DENV unspecified cases; however, there were DENV4 cases imported from Papua New Guinea to Australia<br>Literature: Not described in the literature<br>ProMed: Not reported on ProMed<br>Imported cases reported on PacNet: 19 DENV cases were imported into Queensland, Australia, Australia in this time frame, 7 cases confirmed as DENV4 |
| Feb 2018                 | Vanuatu          | June 2018          | DENV2            | PacNet: 504 cases reported, 70 confirmed<br>Literature: Craig 2018 reported that there was an outbreak of DEN2 during this time; however, they did not mention specific case numbers<br>ProMed: 246 cases reported, 44 laboratory confirmed<br>Imported cases: 6 imported into New Caledonia, 1 into New Zealand, 2 into Queensland, Australia                                               |
| April 2018               | American Samoa   | Nov 2018           | DENV2            | PacNet: 1100 laboratory confirmed<br>Literature: Not described in the literature<br>ProMed: Not reported on ProMed<br>Imported cases: No cases were imported into another country                                                                                                                                                                                                            |
| May 2018                 | French Polynesia | Dec 2018           | DENV1            | PacNet: 176<br>Literature: Not described in the literature<br>ProMed: Not reported on ProMed<br>Imported cases: 4 imported into New Zealand                                                                                                                                                                                                                                                  |
| June 2018                | French Polynesia | June 2018          | DENV2            | PacNet: 2 autochthonous cases<br>Literature: Aubry 2019 described 2 autochthonous cases<br>ProMed: Not reported on ProMed<br>Imported cases: No cases were imported into another country                                                                                                                                                                                                     |

| First reported (Mth/ Yr) | PICs              | Latest information | Implicated virus | Summary notes and reported case numbers (confirmed/suspected/unspecified)                                                                                                                                                                                                                                                                             |
|--------------------------|-------------------|--------------------|------------------|-------------------------------------------------------------------------------------------------------------------------------------------------------------------------------------------------------------------------------------------------------------------------------------------------------------------------------------------------------|
| Dec 2018                 | Nauru             | April 2019         | DENV1            | PacNet: 42 cases<br>Literature: Not described in the literature<br>ProMed: Not reported on ProMed<br>Imported cases: 6 imported into Queensland, Australia, Aus                                                                                                                                                                                       |
| Dec 2018                 | Republic of Palau | April 2020         | DENV3            | PacNet: 828 cases – first cases of DENV3 in Palau<br>Literature: Not described in the literature<br>ProMed: Not reported on ProMed<br>Imported cases: 2 imported into CNMI                                                                                                                                                                            |
| Jan 2019                 | New Caledonia     | March 2019         | DENV2            | PacNet: 1535 cases<br>Literature: Not described in the literature<br>ProMed: Not reported on ProMed<br>Imported cases: 1 imported into New Zealand, 1 imported in French Polynesia, 3 imported into Wallis and Futana                                                                                                                                 |
| Jan 2019                 | Vanuatu           | April 2019         | DENV2            | PacNet: 216 cases<br>Literature: Not described in the literature<br>ProMed: Not reported on ProMed<br>Imported cases: No cases were imported into another country                                                                                                                                                                                     |
| Jan 2019                 | Fiji              | April 2020         | DENV unspecified | PacNet: No local cases were described in PacNet; however, several imported cases were described on PacNet<br>Literature: Not described in the literature<br>ProMed: 1894 unspecified<br>Imported cases reported on PacNet:<br>DENV unspecified cases imported into New Zealand = 43<br>DENV unspecified cases imported into Queensland, Australia = 3 |
| Jan 2019                 | Fiji              | April 2020         | DENV1            | PacNet: No local DENV1 cases were described in PacNet, however several imported cases were described on PacNet<br>Literature: Not described in the literature<br>ProMed: Did not describe a DENV1 outbreak, just an unspecified outbreak of 1894 cases<br>Imported cases reported on PacNet:<br>DENV1 cases imported into New Zealand = 25            |

| First reported (Mth/ Yr) | PICs             | Latest information | Implicated virus | Summary notes and reported case numbers (confirmed/suspected/unspecified)                                                                                                                                                                                                                                                                                                                                                            |
|--------------------------|------------------|--------------------|------------------|--------------------------------------------------------------------------------------------------------------------------------------------------------------------------------------------------------------------------------------------------------------------------------------------------------------------------------------------------------------------------------------------------------------------------------------|
|                          |                  |                    |                  | DENV1 cases imported into Queensland, Australia = 19                                                                                                                                                                                                                                                                                                                                                                                 |
| Jan 2019                 | Fiji             | April 2020         | DENV2            | <p>PacNet: PacNet: No local DENV2 cases were described in PacNet; however, several imported cases were described on PacNet</p> <p>Literature: Not described in the literature</p> <p>ProMed: Did not describe a DENV2 outbreak, just an unspecified outbreak of 1894 cases</p> <p>Imported cases reported on PacNet:</p> <p>DENV2 cases imported into New Zealand = 4</p> <p>DENV2 cases imported into Queensland, Australia = 7</p> |
| Jan 2019                 | FSM (Yap State)  | July 2019          | DENV3            | <p>PacNet: 1661 cases (485 confirmed with NS1, 54 with IgM and 5 deaths were reported)</p> <p>Literature: Not described in the literature</p> <p>ProMed: Not reported on ProMed</p> <p>Imported cases: No cases were imported into another country</p>                                                                                                                                                                               |
| Feb 2019                 | French Polynesia | June 2020          | DENV2            | <p>PacNet: 2886 cases</p> <p>Literature: Aubry 2019: 106 cases during a DENV2 outbreak</p> <p>ProMed: Not reported on ProMed</p> <p>Imported cases: 7 imported into New Zealand, 2 into Cook Islands, 1 imported into Queensland, Australia, Australia</p>                                                                                                                                                                           |
| Feb 2019                 | French Polynesia | February 2020      | DENV3            | <p>PacNet: PacNet only reported imported cases of DENV3</p> <p>Literature: DENV3 in French Polynesia not described in the literature at this time</p> <p>ProMed: DENV3 in FP not reported on ProMed at this time</p> <p>Imported cases reported on PacNet: 1 case imported into Cook islands of DENV3 from French Polynesia</p>                                                                                                      |
| Feb 2019                 | Cook Islands     | June 2020          | DENV1            | <p>PacNet: 84 cases</p> <p>Literature: Not described in the literature</p> <p>ProMed: Not reported on ProMed</p> <p>Imported cases: 6 cases imported into New Zealand</p>                                                                                                                                                                                                                                                            |
| Feb 2019                 | Cook Islands     | June 2020          | DENV2            | <p>PacNet: 35 cases</p> <p>Literature: Not described in the literature</p> <p>ProMed: Not reported on ProMed</p>                                                                                                                                                                                                                                                                                                                     |

| First reported (Mth/ Yr) | PICs              | Latest information | Implicated virus | Summary notes and reported case numbers (confirmed/suspected/unspecified)                                                                                                                                                                                            |
|--------------------------|-------------------|--------------------|------------------|----------------------------------------------------------------------------------------------------------------------------------------------------------------------------------------------------------------------------------------------------------------------|
|                          |                   |                    |                  | Imported cases: No imported cases into another country                                                                                                                                                                                                               |
| Feb 2019                 | Cook Islands      | June 2020          | DENV unspec      | PacNet: 233 cases<br>Literature: Not described in the literature<br>ProMed: Not reported on ProMed<br>Imported cases: 4 cases imported into New Zealand                                                                                                              |
| February 2019            | Wallis and Futana | June 2020          | DENV2            | PacNet: 77 cases<br>Literature: Not described in the literature<br>ProMed: Not reported on ProMed<br>Imported cases: No cases were imported into another country                                                                                                     |
| March 2019               | Tuvalu            | September 2019     | DENV unspecified | PacNet: 530 cases, with 215 cases RDT positives<br>Literature: Not described in the literature<br>ProMed: Not reported on ProMed<br>Imported cases: 1 imported into New Zealand, 1 imported into Kiribati                                                            |
| June 2019                | French Polynesia  | September 2019     | DENV1            | PacNet: 277 cases<br>Literature: Aubry 2019 reported that DENV1 transmission was present in June 2019<br>ProMed: Not reported on ProMed<br>Imported cases: 2 imported into Queensland, Australia                                                                     |
| August 2019              | Marshall Islands  | June 2020          | DENV3            | PacNet: 3446 (1606 laboratory confirmed)<br>Literature: Not described in the literature<br>ProMed: Not reported on ProMed<br>Imported cases: No cases were imported into another country                                                                             |
| Sept 2019                | Guam              | Oct 2019           | DENV3            | PacNet: 18 cases - These are the first confirmed locally acquired dengue cases detected in Guam in the last 75 years<br>Literature: Not described in the literature<br>ProMed: Not reported on ProMed<br>Imported cases: No cases were imported into another country |
| Jun 2014                 | American Samoa    | Dec 2014           | CHIKV            | Pacnet: 1171 cases<br>Literature : (Wahid,2017) 2500                                                                                                                                                                                                                 |

| First reported (Mth/ Yr) | PICs             | Latest information | Implicated virus | Summary notes and reported case numbers (confirmed/suspected/unspecified)                                                                                                                                                                                   |
|--------------------------|------------------|--------------------|------------------|-------------------------------------------------------------------------------------------------------------------------------------------------------------------------------------------------------------------------------------------------------------|
| Jul 2014                 | Tokelau          | October 2014       | CHIKV            | Literature : (Wahid, 2017) 200 cases<br>Pacnet : 164 cases                                                                                                                                                                                                  |
| Jul 2014                 | Samoa            | March 2015         | CHIKV            | Pacnet : 4,524 cases<br>Literature: (Wahid, 2017) 308 cases                                                                                                                                                                                                 |
| Oct 2014                 | New Caledonia    | Dec 2014           | CHIKV            | Pacnet 58 cases<br>Literature: (Nhan 2015) 29 cases                                                                                                                                                                                                         |
| Oct 2014                 | French Polynesia | March 2015         | CHIKV            | Pacnet: 66,000 cases, 64 cases admitted to an intensive care unit, 18 deaths<br>Promed: 200000 cases                                                                                                                                                        |
| Oct 2014                 | Cook Islands     | August 2015        | CHIKV            | Pacnet: 782 cases<br>Literature: (Wahid, 2017) 597 cases                                                                                                                                                                                                    |
| Dec 2014                 | Kiribati         | March 2015         | CHIKV            | Pacnet: 13,309 cases<br>Literature: (Wahid, 2017) 3000                                                                                                                                                                                                      |
| Feb 2015                 | Marshall Islands | October 2015       | CHIKV            | Pacnet: 1,317 cases                                                                                                                                                                                                                                         |
| Mar 2015                 | Fiji             | Mar 2015           | CHIKV            | Literature : (Aubry 2020) 4 cases<br>Promed : 2 cases                                                                                                                                                                                                       |
| Jun 2015                 | Nauru            | Jun 2015           | CHIKV            | Pacnet: 21 cases                                                                                                                                                                                                                                            |
| Oct 2015                 | Tuvalu           | Nov 2015           | CHIKV            | Pacnet: 7 cases                                                                                                                                                                                                                                             |
| Jan 2016                 | New Caledonia    | Jan 2016           | CHIKV            | Pacnet: 2 cases                                                                                                                                                                                                                                             |
| Feb 2016                 | Fiji             | June 2016          | CHIKV            | Literature: (Aubry 2020) 86 cases<br>PacNet: "several cases"<br>ProMed: 41 cases                                                                                                                                                                            |
| Aug 2017                 | Fiji             | Sept 2017          | CHIKV            | Literature: (Aubry 2020) 2 cases                                                                                                                                                                                                                            |
| Jan 2014                 | New Caledonia    | March 2015         | ZIKV             | PacNet: 7 cases<br>Literature: 2 pieces of literature<br>- Oliver :1500 cases<br>- ECDC 82 cases with 10 imported cases mentioned in the article<br>ProMed: Not reported on ProMed<br>Imported cases: No cases were imported cases were mentioned on PacNet |

| First reported (Mth/ Yr) | PICs            | Latest information | Implicated virus | Summary notes and reported case numbers (confirmed/suspected/unspecified)                                                                                                                                                                                                                                                                                                                                                                                                                                                                                                                                                                                                                                  |
|--------------------------|-----------------|--------------------|------------------|------------------------------------------------------------------------------------------------------------------------------------------------------------------------------------------------------------------------------------------------------------------------------------------------------------------------------------------------------------------------------------------------------------------------------------------------------------------------------------------------------------------------------------------------------------------------------------------------------------------------------------------------------------------------------------------------------------|
| March 2015               | Solomon Islands | May 2015           | ZIKV             | <p>PacNet: 310</p> <p>Literature: 5 pieces of literature</p> <ul style="list-style-type: none"> <li>- Craig: 5 confirmed cases</li> <li>- ECDC: 302 cases reported</li> <li>- Hills: "outbreak reported" in early 2015</li> <li>- Musso : 310 cases</li> <li>- Mavian: stated zika was present in Solomon Island Islands in 2015</li> </ul> <p>ProMed: In March 2016 Promed had a piece talking about the Zika Outbreak refering to a rise in GBS in 2015</p> <p>Imported cases: 3 cases were imported from Solomon Islands to Queensland, Australia, Aus</p>                                                                                                                                              |
| March 2015               | Vanuatu         | April 2015         | ZIKV             | <p>PacNet: 7</p> <p>Literature: 5 pieces of literature</p> <ul style="list-style-type: none"> <li>- Craig: 1 confirmed case in April 2015</li> <li>- Hills: "outbreak reported"</li> <li>- ECDC: confirmed cases in Vanuatu, unspecific numbers</li> <li>- Musso : Unspecific number of confirmed cases reported by health officials in weeks after Cyclone Pam passed through Vanuatu in 2015</li> </ul> <p>ProMed: in April 2015 Promed mentioned the Zika Break and the relationship with it occurring just after Cyclone Pam</p> <ul style="list-style-type: none"> <li>- Mavian: states that Zika present in 2015</li> </ul> <p>Imported cases: 1 case was imported from Vanuatu to New Caledonia</p> |
| May 2015                 | PNG             | March 2016         | ZIKV             | <p>PacNet: No local cases were reported on PacNet</p> <p>Literature: 2 pieces of literature</p> <ul style="list-style-type: none"> <li>- Craig: 6 confirmed cases May 2015 to March 2016</li> <li>- Hills: described retrospective sample testing from 2015 suggests presence of Zika in 2015</li> </ul> <p>ProMed: Not reported on ProMed</p> <p>WHO Outbreak Report: 6 confirmed cases on retrospective samples, none of the patients positive for Zika Virus had travelled outside of PNG prior to their illness. Samples were tested from July 2014 to March 2016</p> <p>Imported cases: Pacnet described 1 imported case from PNG to New Zealand</p>                                                  |
| August 2015              | Fiji            | Oct 2016           | ZIKV             | <p>PacNet: 15 confirmed</p> <p>Literature: 7 pieces of literature</p> <ul style="list-style-type: none"> <li>- Craig: 15 confirmed cases from Aug 2015- June 2016</li> <li>- Hills: sated that an outbreak had been reported</li> </ul>                                                                                                                                                                                                                                                                                                                                                                                                                                                                    |

| First reported (Mth/ Yr) | PICs           | Latest information | Implicated virus | Summary notes and reported case numbers (confirmed/suspected/unspecified)                                                                                                                                                                                                                                                                                                                                                                                                                                                                                                                                                                                              |
|--------------------------|----------------|--------------------|------------------|------------------------------------------------------------------------------------------------------------------------------------------------------------------------------------------------------------------------------------------------------------------------------------------------------------------------------------------------------------------------------------------------------------------------------------------------------------------------------------------------------------------------------------------------------------------------------------------------------------------------------------------------------------------------|
|                          |                |                    |                  | <ul style="list-style-type: none"> <li>- Kama: 13 confirmed cases July 2015- March 2016</li> <li>- Sheel: 583 zika like illnesses after the cyclone 2016</li> <li>- Paixo: Reported Zika cases in 2016</li> <li>- Musso reported cases however exact numbers were not available in 2015</li> <li>- Mavian: reported that Zika was present in 2015</li> <li>ProMed: 17 cases from March - June 2016</li> <li>Imported cases: 10 imported into New Zealand, 8 imported into Queensland, Australia, Aus</li> </ul>                                                                                                                                                        |
| September 2015           | Samoa          | May 2016           | ZIKV             | PacNet: 167 suspected cases, 24 confirmed cases<br>Literature: 6 pieces of literature <ul style="list-style-type: none"> <li>- Craig: 24 confirmed cases Sept 2015- May 2016</li> <li>- Hills: stated that an outbreak had been reported</li> <li>- Samrasekera: reported active transmission as of Feb 2016</li> <li>- Paixo: reported an undetermined number of cases of Zika in Samoa in 2016</li> <li>- Musso: reported cases in Samoa in 2015</li> <li>- Mavian: stated that Zika was present in 2015 and 2016</li> </ul> ProMed: 11 cases active in March 2016<br>Imported cases: 22 cases imported into New Zealand, 1 case imported into Queensland, Australia |
| Dec 2015                 | Cook Islands   | Dec 2015           | ZIKV             | PacNet: Reported that Zika cases had been reported for the first time in Cook Island, no numbers were stated<br>Literature: Not described in the literature<br>ProMed: Not reported on ProMed<br>Imported cases: No cases were imported into another country                                                                                                                                                                                                                                                                                                                                                                                                           |
| Jan 2016                 | Tonga          | June 2016          | ZIKV             | PacNet: 2420 cases<br>Literature: 3 pieces of literature <ul style="list-style-type: none"> <li>- Craig: 2 confirmed cases Jan 2016- April 2016</li> <li>- Hills: reported cases however no data</li> <li>- Mavian: reported that Zika was present</li> </ul> ProMed: Jan 2016 reported that 2000 suspected cases, with Australia confirming a case in a traveller returning to Queensland, Australia from Tonga<br>Imported cases: No cases were imported into another country                                                                                                                                                                                        |
| Jan 2016                 | American Samoa | Feb 2017           | ZIKV             | PacNet: 1004 suspected, 58 confirmed, 33 pregnant confirmed cases<br>Literature: 4 pieces of literature                                                                                                                                                                                                                                                                                                                                                                                                                                                                                                                                                                |



| First reported (Mth/ Yr) | PICs                         | Latest information | Implicated virus | Summary notes and reported case numbers (confirmed/suspected/unspecified)                                                                                                                                                                                                                                                                                                                                                                                                                                                                                                     |
|--------------------------|------------------------------|--------------------|------------------|-------------------------------------------------------------------------------------------------------------------------------------------------------------------------------------------------------------------------------------------------------------------------------------------------------------------------------------------------------------------------------------------------------------------------------------------------------------------------------------------------------------------------------------------------------------------------------|
|                          |                              |                    |                  | <ul style="list-style-type: none"> <li>- Craig 23 confirmed cases from Jan 2016 to April 2016</li> <li>- Healy: 756 suspected, 51 laboratory confirmed, between Jan 2015- July 2015</li> <li>- Samarasekera reported that there was active transmission in Feb 2016</li> <li>- Mavian stated that Zika was present in 2016</li> </ul> <p>ProMed: 2 Promed reports – one stating that from Feb 2016 – November 2016 estimated 1000 cases, another report stating that there had been 25 confirmed cases</p> <p>Imported cases: No cases were imported into another country</p> |
| Feb 2016                 | Republic of Marshall Islands | April 2016         | ZIKV             | <p>PacNet: 34 suspected cases, 2 confirmed</p> <p>Literature: 3 pieces of literature</p> <ul style="list-style-type: none"> <li>- Craig: 2 confirmed cases Feb 2016- April 2016</li> <li>- Hills: reported that there were cases present</li> <li>- Mavian stated that zika was present in 2016</li> </ul> <p>ProMed: 2 cases reported</p> <p>Imported cases: 1 case was imported into Australia</p>                                                                                                                                                                          |
| Feb 2016                 | FSM                          | Dec 2016           | ZIKV             | <p>PacNet: 238 cases, 27 confirmed, 20 pregnant confirmed cases</p> <p>Literature: 2 pieces of literature</p> <ul style="list-style-type: none"> <li>- Craig- 23 confirmed cases in Feb 2016, and added that the outbreak was still ongoing in Nov 2016</li> <li>- Hills: reported cases however no numbers or dates</li> </ul> <p>ProMed: Reported that there was local transmission however no numbers stated</p> <p>Imported cases: No cases were imported into another country</p>                                                                                        |
| March 2016               | New Caledonia                | March 2016         | ZIKV             | <p>PacNet: 1 local case</p> <p>Literature: Craig : 82 confirmed cases</p> <p>ProMed: Not reported on ProMed</p> <p>Imported cases: No cases were imported into another country</p>                                                                                                                                                                                                                                                                                                                                                                                            |
| Nov 2016                 | Palau                        | Nov 2016           | ZIKV             | <p>PacNet: 1 laboratory confirmed case</p> <p>Literature: 3 pieces of literature</p> <ul style="list-style-type: none"> <li>- Craig: 1 confirmed case in Nov 2016</li> <li>- Hills: cases were reported, nil dates or exact figures</li> <li>- Mavian: stated that Zika was present in 2016</li> </ul> <p>ProMed: Reported that there was 1 locally acquired case in Nov 2016</p> <p>Imported cases: No cases were imported into another country</p>                                                                                                                          |

| First reported (Mth/ Yr)         | PICs                         | Latest information | Implicated virus | Summary notes and reported case numbers (confirmed/suspected/unspecified)                                                                                                                                                                                                               |
|----------------------------------|------------------------------|--------------------|------------------|-----------------------------------------------------------------------------------------------------------------------------------------------------------------------------------------------------------------------------------------------------------------------------------------|
| 2016 (no specific months listed) | Solomon Islands              | 2016               | ZIKV             | PacNet: No cases reported<br>Literature: Paixo reported that there were Zika cases in Solomon Islands in 2016, no specific dated or numbers were reported<br>ProMed: Not reported on ProMed<br>Imported cases: 1 case was imported from Solomon Islands to Queensland, Australia, Aus   |
| 2016 (no specific months listed) | French Polynesia             | 2016               | ZIKV             | PacNet: No reported cases<br>Literature: Musso reported 42 asymptomatic blood donor patients found to have Zika through a study looking at blood transfusions, no specific dates given<br>ProMed: Not reported on ProMed<br>Imported cases: No cases were imported into another country |
| 2016 (no specific months listed) | Kiribati                     | 2016               | ZIKV             | PacNet: No reported cases<br>Literature: Mavian stated that Zika was present in Kiribati in 2016, no specific dates or numbers mentioned<br>ProMed: Not reported on ProMed<br>Imported cases: No cases were imported into another country                                               |
| Jan 2017                         | Republic of Marshall Islands | Jan 2017           | ZIKV             | PacNet: Reported that a State of Health Emergency was declared for Republic of Marshall Islands in Jan 2017 for Zika<br>Literature: Not described in the literature<br>ProMed: Not reported on ProMed<br>Imported cases: No cases were imported into another country                    |
| June 2018                        | American Samoa               | Nov 2018           | ZIKV             | PacNet: 26<br>Literature: Not described in the literature<br>ProMed: Not reported on ProMed<br>Imported cases: No cases were imported into another country                                                                                                                              |
